# Supplementary material for: RETRACTED: A Mendelian Randomization Analysis Investigates Causal Associations between Inflammatory Bowel Diseases and Variable Risk Factors
Source: MDPI journal article supplement (doi:10.3390/nu15051202), 2023-02-27
Supplement: s1 [file s1]

Supplementary Table S1. Variable risk factors for ulcerative colitis.

| Exposure               | SNPs | Inverse Variance Weighted     |              | Weighted Median               |              | MR-Egger                      |              | SNPs | MR-PRESSO                     |              | <i>P</i>      | <i>P</i>     |
|------------------------|------|-------------------------------|--------------|-------------------------------|--------------|-------------------------------|--------------|------|-------------------------------|--------------|---------------|--------------|
|                        |      | OR (95% CI)                   | <i>P</i>     | OR (95% CI)                   | <i>P</i>     | OR (95% CI)                   | <i>P</i>     |      | OR (95% CI)                   | <i>P</i>     | heterogeneity | pleiotropy   |
| Exposure to drugs      |      |                               |              |                               |              |                               |              |      |                               |              |               |              |
| Antibiotics            | 50   | 1.068 (0.676 to 1.460)        | 0.055        | 1.451 (1.317 to 1.901)        | 0.115        | 1.430 (1.186 to 1.489)        | 0.078        | 50   | 1.466 (1.276 to 1.460)        | 0.202        | 0.189         | 0.142        |
| Isotretinoin           | 17   | 1.447 (0.937 to 1.957)        | 0.107        | 1.411 (0.799 to 2.203)        | 0.24         | 1.336 (0.203 to 7.532)        | 0.831        | 17   | 1.455 (0.937 to 1.957)        | 0.108        | 0.138         | 0.094        |
| Lifestyle              |      |                               |              |                               |              |                               |              |      |                               |              |               |              |
| Smoking                | 102  | <b>1.342 (1.035 to 1.649)</b> | <b>0.021</b> | 1.112 (0.712 to 1.624)        | 0.201        | 1.463 (0.447 to 4.157)        | 0.599        | 102  | <b>1.415 (1.144 to 1.758)</b> | <b>0.022</b> | 0.948         | 0.919        |
| Cigarettes per day     | 33   | 0.974 (0.776 to 1.118)        | 0.446        | 0.925 (0.729 to 1.183)        | 0.165        | 0.813 (0.618 to 1.083)        | 0.059        | 33   | 1.032 (0.776 to 1.118)        | 0.447        | 0.521         | 0.521        |
| Breastfeeding          | 42   | <b>0.791 (0.671 to 0.912)</b> | 0.002        | <b>0.547 (0.413 to 0.695)</b> | <b>0.001</b> | <b>0.430 (0.287 to 0.590)</b> | <b>0.011</b> | 42   | <b>0.466 (0.377 to 0.561)</b> | <b>0.001</b> | 0.189         | 0.142        |
| Alcoholic drink        | 42   | 1.596 (0.706 to 2.487)        | 0.380        | 2.140 (0.891 to 3.363)        | 0.143        | 1.524(0.434 to 2.721)         | 0.402        | 42   | 1.426 (0.706 to 2.487)        | 0.381        | 0.408         | 0.413        |
| Fruit intake           | 71   | <b>0.726 (0.492 to 0.961)</b> | <b>0.001</b> | <b>0.184 (0.110 to 0.262)</b> | <b>0.028</b> | 0.164 (0.953 to 1.185)        | 0.283        | 71   | <b>0.164 (0.117 to 0.212)</b> | <b>0.009</b> | 0.396         | 0.411        |
| Vegetables intake      | 32   | <b>0.731 (0.581 to 0.882)</b> | <b>0.001</b> | <b>0.620 (0.443 to 0.890)</b> | <b>0.004</b> | <b>0.235 (0.142 to 0.537)</b> | <b>0.012</b> | 32   | <b>0.661 (0.519 to 0.851)</b> | <b>0.001</b> | 0.092         | <b>0.040</b> |
| Coffee intake          | 33   | 1.351 (0.613 to 2.089)        | 0.693        | 1.236 (0.489 to 2.744)        | 0.771        | 0.844 (0.211 to 2.617)        | 0.657        | 33   | 1.222 (0.613 to 2.089)        | 0.694        | 0.438         | 0.356        |
| Tea intake             | 23   | <b>1.301 (1.081 to 1.522)</b> | <b>0.015</b> | 0.925 (0.729 to 1.193)        | 0.165        | 1.156 (0.851 to 1.310)        | 0.637        | 23   | 1.301 (0.869 to 1.155)        | 0.982        | 0.051         | 0.059        |
| High vitamin D level   | 87   | <b>0.490 (0.225 to 0.755)</b> | <b>0.001</b> | 1.198 (0.890 to 1.627)        | 0.283        | 1.542 (0.587 to 3.538)        | 0.221        | 87   | <b>0.312 (0.209 to 1.450)</b> | <b>0.047</b> | 0.344         | 0.246        |
| Cesarean delivery      | 46   | 1.121 (0.893 to 1.218)        | 0.414        | 1.144 (0.895 to 1.201)        | 0.514        | 1.207 (0.876 to 1.403)        | 0.566        | 46   | 1.203 (0.863 to 1.418)        | 0.295        | 0.311         | 0.233        |
| Physical activity      | 56   | <b>0.478 (0.250 to 0.701)</b> | <b>0.001</b> | 0.646 (0.374 to 1.190)        | 0.088        | 0.265 (0.011 to 2.363)        | 0.202        | 56   | <b>0.519 (0.351 to 0.802)</b> | <b>0.002</b> | 0.053         | 0.135        |
| Surgeries              |      |                               |              |                               |              |                               |              |      |                               |              |               |              |
| Appendectomy           | 65   | <b>1.368 (1.276 to 1.460)</b> | <b>0.000</b> | <b>1.547 (1.413 to 1.695)</b> | <b>0.001</b> | <b>1.430 (1.287 to 1.590)</b> | <b>0.011</b> | 65   | <b>1.466 (1.377 to 1.571)</b> | <b>0.001</b> | 0.189         | 0.142        |
| Tonsillectomy          | 50   | 0.915 (0.705 to 1.189)        | 0.508        | 0.807 (0.476 to 1.047)        | 0.085        | 0.955 (0.579 to 1.261)        | 0.442        | 50   | 1.915 (1.705 to 2.189)        | 0.509        | <b>0.044</b>  | 0.057        |
| Related diseases       |      |                               |              |                               |              |                               |              |      |                               |              |               |              |
| Type 2 diabetes        | 88   | 1.042 (0.963 to 1.128)        | 0.304        | 1.135 (0.905 to 1.182)        | 0.624        | 1.147 (0.865 to 1.263)        | 0.656        | 88   | 1.143 (0.963 to 1.128)        | 0.305        | 0.241         | 0.203        |
| Chronic kidney disease | 14   | 1.210 (0.987 to 1.484)        | 0.067        | 1.311 (0.951 to 1.540)        | 0.123        | 1.993 (0.954 to 3.752)        | 0.22         | 14   | 1.311 (0.987 to 1.484)        | 0.068        | 0.529         | 0.527        |
| Autoimmune             | 81   | 0.985 (0.915 to 1.060)        | 0.682        | 1.059 (0.862 to 1.066)        | 0.434        | 0.979 (0.775 to 0.995)        | 0.056        | 81   | 0.899 (0.915 to 1.060)        | 0.683        | 0.063         | 0.071        |
| Celiac disease         | 14   | 0.999 (0.971 to 1.028)        | 0.937        | 1.007 (0.954 to 1.040)        | 0.858        | 1.076 (0.930 to 1.022)        | 0.308        | 14   | 1.003 (0.971 to 1.028)        | 0.938        | 0.354         | 0.344        |

|                              |     |                        |       |                        |       |                        |       |     |                        |       |       |       |
|------------------------------|-----|------------------------|-------|------------------------|-------|------------------------|-------|-----|------------------------|-------|-------|-------|
| Systemic lupus erythematosus | 23  | 1.008 (0.980 to 1.036) | 0.990 | 1.102 (0.956 to 1.048) | 0.963 | 1.077 (0.906 to 1.052) | 0.541 | 23  | 0.956 (0.967 to 1.034) | 0.991 | 0.121 | 0.097 |
| Blood parameters             |     |                        |       |                        |       |                        |       |     |                        |       |       |       |
| Blood calcium                | 11  | 1.092 (0.720 to 1.657) | 0.679 | 1.413 (0.806 to 2.138) | 0.099 | 1.725 (0.752 to 3.516) | 0.283 | 11  | 0.992 (0.720 to 1.657) | 0.681 | 0.702 | 0.805 |
| Blood glucose                | 12  | 1.080 (0.988 to 1.181) | 0.091 | 1.186 (0.985 to 1.196) | 0.992 | 1.211 (0.815 to 1.506) | 0.572 | 12  | 1.191 (0.988 to 1.181) | 0.092 | 0.951 | 0.931 |
| C-reactive protein           | 11  | 1.002 (0.869 to 1.155) | 0.981 | 1.009 (0.804 to 1.241) | 0.054 | 1.156 (0.851 to 1.310) | 0.637 | 11  | 1.205 (0.869 to 1.155) | 0.982 | 0.051 | 0.059 |
| Blood zinc                   | 117 | 1.082 (0.725 to 1.614) | 0.699 | 1.940 (1.125 to 2.756) | 0.002 | 1.977 (1.203 to 2.751) | 0.038 | 117 | 1.405 (0.725 to 1.614) | 0.711 | 0.061 | 0.062 |
| Lipid metabolism             |     |                        |       |                        |       |                        |       |     |                        |       |       |       |
| n-3 PUFA                     | 103 | 0.200 (0.033 to 0.368) | 0.001 | 0.261 (0.933 to 1.441) | 0.273 | 1.166 (0.845 to 1.342) | 0.607 | 103 | 0.290 (0.134 to 0.469) | 0.017 | 0.025 | 0.035 |
| Triglycerides                | 114 | 0.951 (0.840 to 1.078) | 0.435 | 1.223 (0.914 to 1.377) | 0.055 | 1.236 (0.835 to 1.272) | 0.792 | 114 | 1.001 (0.840 to 1.078) | 0.436 | 0.351 | 0.398 |
| n-6 PUFA                     | 84  | 0.854 (0.718 to 0.991) | 0.038 | 0.908 (0.748 to 1.069) | 0.042 | 0.678 (0.402 to 0.955) | 0.114 | 84  | 0.785 (0.626 to 0.944) | 0.017 | 0.005 | 0.002 |
| Apolipoprotein A-I           | 36  | 1.013 (0.872 to 1.177) | 0.867 | 1.444 (1.001 to 1.887) | 0.043 | 1.350 (0.962 to 1.622) | 0.111 | 36  | 1.224 (0.872 to 1.177) | 0.868 | 0.052 | 0.077 |
| Total cholesterol            | 42  | 0.859 (0.752 to 0.966) | 0.017 | 0.903 (0.643 to 1.001) | 0.062 | 0.564 (0.311 to 0.817) | 0.022 | 42  | 0.685 (0.516 to 0.854) | 0.111 | 0.144 | 0.137 |
| Glucose metabolism           |     |                        |       |                        |       |                        |       |     |                        |       |       |       |
| Fasting glucose              | 42  | 1.283 (0.943 to 1.745) | 0.113 | 1.178 (0.669 to 1.733) | 0.762 | 1.131 (0.584 to 1.781) | 0.955 | 42  | 1.391 (0.943 to 1.745) | 0.114 | 0.407 | 0.372 |
| HbA1c                        | 33  | 1.103 (0.649 to 1.876) | 0.716 | 1.604 (0.712 to 3.137) | 0.29  | 1.542 (0.508 to 4.086) | 0.505 | 33  | 1.316 (0.842 to 2.088) | 0.224 | 0.016 | 0.004 |
| Fasting insulin              | 54  | 1.925 (0.961 to 3.858) | 0.065 | 1.826 (0.723 to 4.169) | 0.219 | 0.456 (0.042 to 2.816) | 0.338 | 54  | 1.899 (0.961 to 3.858) | 0.066 | 0.067 | 0.066 |
| Obesity traits               |     |                        |       |                        |       |                        |       |     |                        |       |       |       |
| Body mass index              | 523 | 1.392 (1.144 to 1.641) | 0.006 | 1.225 (0.899 to 1.498) | 0.189 | 1.077 (0.606 to 1.571) | 0.93  | 523 | 1.452 (1.242 to 1.662) | 0.091 | 0.119 | 0.067 |
| Whole body fat mass          | 412 | 1.363 (1.106 to 1.621) | 0.004 | 1.295 (0.918 to 1.553) | 0.071 | 0.971 (0.508 to 1.490) | 0.624 | 412 | 1.336 (1.161 to 1.512) | 0.102 | 0.001 | 0.001 |
| Waist circumference          | 67  | 2.466 (2.093 to 2.968) | 0.111 | 1.456 (1.001 to 2.183) | 0.212 | 1.363 (0.331 to 4.732) | 0.753 | 67  | 1.567 (1.093 to 1.968) | 0.156 | 0.157 | 0.125 |
| Hip circumference            | 55  | 1.280 (0.631 to 1.863) | 0.121 | 0.817 (0.697 to 1.222) | 0.241 | 1.622 (0.676 to 3.417) | 0.325 | 55  | 1.881 (1.631 to 1.963) | 0.122 | 0.618 | 0.591 |
| Waist-to-hip ratio           | 36  | 1.354 (0.937 to 1.957) | 0.107 | 1.436 (0.826 to 2.157) | 0.115 | 1.336 (0.311 to 2.302) | 0.831 | 36  | 1.455 (1.038 to 2.058) | 0.108 | 0.138 | 0.094 |

Supplementary Table S2. Variable risk factors for Crohn’s disease.

| Exposure               | SNPs | Inverse Variance Weighted |          | Weighted Median        |          | MR-Egger                |          | SNPs | MR-PRESSO              |          | <i>P</i>      | <i>P</i> pleiotropy |
|------------------------|------|---------------------------|----------|------------------------|----------|-------------------------|----------|------|------------------------|----------|---------------|---------------------|
|                        |      | OR (95% CI)               | <i>P</i> | OR (95% CI)            | <i>P</i> | OR (95% CI)             | <i>P</i> |      | OR (95% CI)            | <i>P</i> | heterogeneity |                     |
| Exposure to drugs      |      |                           |          |                        |          |                         |          |      |                        |          |               |                     |
| Antibiotics            | 50   | 1.745 (1.356 to 2.230)    | 0.005    | 1.547 (1.312 to 1.594) | 0.112    | 1.430 (1.186 to 1.489)  | 0.078    | 50   | 1.368 (1.276 to 1.460) | 0.003    | 0.188         | 0.143               |
| Isotretinoin           | 17   | 1.354 (0.937 to 1.957)    | 0.107    | 1.436 (0.826 to 2.157) | 0.237    | 1.336 (0.203 to 7.532)  | 0.831    | 17   | 1.454 (0.937 to 1.957) | 0.109    | 0.137         | 0.095               |
| Lifestyle              |      |                           |          |                        |          |                         |          |      |                        |          |               |                     |
| Smoking                | 102  | 1.595 (1.155 to 2.204)    | 0.005    | 1.635 (0.975 to 2.413) | 0.063    | 2.602 (0.760 to 4.084)  | 0.121    | 102  | 1.783 (1.256 to 2.311) | 0.007    | 0.196         | 0.18                |
| Cigarettes per day     | 33   | 1.249 (0.972 to 1.604)    | 0.082    | 1.223 (0.787 to 1.598) | 0.525    | 1.069 (0.629 to 1.492)  | 0.897    | 33   | 1.360 (0.972 to 1.604) | 0.084    | 0.391         | 0.338               |
| Breastfeeding          | 42   | 0.710 (0.591 to 0.839)    | 0.002    | 0.416 (0.202 to 0.631) | 0.001    | 1.430 (1.187 to 1.590)  | 0.011    | 42   | 1.531 (1.202 to 1.860) | 0.052    | 0.188         | 0.143               |
| Alcoholic drink        | 42   | 1.728 (1.195 to 2.261)    | 0.020    | 2.986 (0.899 to 4.954) | 0.071    | 1.559 (0.146 to 14.544) | 0.761    | 42   | 1.683 (1.105 to 2.261) | 0.072    | 0.049         | 0.149               |
| Fruit intake           | 71   | 0.571 (0.441 to 0.739)    | 0.001    | 0.117 (0.010 to 0.225) | 0.025    | 1.164 (0.953 to 1.185)  | 0.283    | 71   | 0.164 (0.117 to 0.121) | 0.001    | 0.401         | 0.401               |
| Vegetables intake      | 32   | 0.660 (0.401 to 0.108)    | 0.011    | 0.497 (0.295 to 0.699) | 0.001    | 0.434 (0.241 to 0.636)  | 0.012    | 32   | 0.630 (0.418 to 0.842) | 0.002    | 0.039         | 0.093               |
| Coffee intake          | 33   | 1.052 (0.482 to 2.295)    | 0.898    | 1.222 (0.388 to 3.195) | 0.841    | 1.870 (0.218 to 5.250)  | 0.946    | 33   | 0.999 (0.482 to 2.295) | 0.900    | 0.994         | 0.992               |
| Tea intake             | 23   | 1.281 (1.081 to 1.521)    | 0.115    | 0.911 (0.628 to 1.082) | 0.162    | 1.156 (0.851 to 1.310)  | 0.637    | 23   | 0.998 (0.869 to 1.155) | 0.983    | 0.149         | 0.050               |
| High vitamin D level   | 87   | 0.620 (0.465 to 0.835)    | 0.001    | 0.790 (0.024 to 0.556) | 0.041    | 0.941 (0.102 to 0.781)  | 0.038    | 87   | 0.304 (0.125 to 0.614) | 0.021    | 0.061         | 0.063               |
| Cesarean delivery      | 46   | 1.301 (1.093 to 1.521)    | 0.002    | 1.231 (0.795 to 1.131) | 0.114    | 1.311 (0.776 to 1.330)  | 0.196    | 46   | 1.165 (1.003 to 1.328) | 0.055    | 0.211         | 0.313               |
| Physical activity      | 56   | 0.536 (0.397 to 0.723)    | 0.006    | 0.504 (0.298 to 0.711) | 0.001    | 0.334 (0.241 to 0.636)  | 0.022    | 56   | 0.694 (0.528 to 0.860) | 0.013    | 0.039         | 0.093               |
| Surgeries              |      |                           |          |                        |          |                         |          |      |                        |          |               |                     |
| Appendectomy           | 65   | 1.180 (1.075 to 1.296)    | 0.001    | 1.262 (1.001 to 1.524) | 0.000    | 1.373 (1.190 to 1.587)  | 0.015    | 65   | 1.281 (1.176 to 1.397) | 0.003    | 0.039         | 0.089               |
| Tonsillectomy          | 50   | 1.370 (1.159 to 1.621)    | 0.041    | 0.911 (0.628 to 1.082) | 0.172    | 1.221 (0.851 to 1.310)  | 0.537    | 50   | 0.998 (0.869 to 1.155) | 0.893    | 0.059         | 0.061               |
| Related diseases       |      |                           |          |                        |          |                         |          |      |                        |          |               |                     |
| Type 2 diabetes        | 88   | 1.121 (1.012 to 1.241)    | 0.029    | 1.221 (0.951 to 1.355) | 0.158    | 1.140 (0.814 to 1.326)  | 0.773    | 88   | 1.217 (1.022 to 1.413) | 0.051    | 0.283         | 0.289               |
| Chronic kidney disease | 14   | 1.110 (0.849 to 1.450)    | 0.446    | 1.211 (0.789 to 1.526) | 0.581    | 1.399 (0.587 to 3.538)  | 0.522    | 14   | 1.212 (0.849 to 1.450) | 0.448    | 0.643         | 0.547               |
| Autoimmune             | 81   | 1.123 (1.031 to 1.224)    | 0.008    | 1.121 (0.948 to 1.228) | 0.248    | 1.101 (0.892 to 1.203)  | 0.653    | 81   | 1.167 (1.001 to 1.334) | 0.071    | 0.597         | 0.598               |
| Celiac disease         | 14   | 0.972 (0.938 to 1.007)    | 0.117    | 1.003 (0.926 to 1.022) | 0.273    | 1.007 (0.930 to 1.048)  | 0.682    | 14   | 1.002 (0.938 to 1.007) | 0.119    | 0.581         | 0.545               |

|                              |     |                        |       |                        |       |                        |       |     |                        |       |       |       |
|------------------------------|-----|------------------------|-------|------------------------|-------|------------------------|-------|-----|------------------------|-------|-------|-------|
| Systemic lupus erythematosus | 23  | 0.998 (0.958 to 1.041) | 0.942 | 1.007 (0.930 to 1.047) | 0.658 | 1.008 (0.908 to 1.093) | 0.952 | 23  | 1.008 (0.958 to 1.041) | 0.944 | 0.275 | 0.236 |
| Blood parameters             |     |                        |       |                        |       |                        |       |     |                        |       |       |       |
| Blood calcium                | 11  | 1.933 (0.779 to 3.339) | 0.118 | 1.815 (0.999 to 2.516) | 0.053 | 1.687 (0.578 to 4.354) | 0.423 | 11  | 2.024 (0.998 to 2.819) | 0.071 | 0.889 | 0.896 |
| Blood Lactose                | 12  | 1.024 (0.911 to 1.151) | 0.032 | 1.008 (0.891 to 1.152) | 0.839 | 1.110 (0.675 to 1.508) | 0.978 | 12  | 1.125 (0.911 to 1.151) | 0.688 | 0.705 | 0.738 |
| C-reactive protein           | 11  | 1.048 (0.880 to 1.248) | 0.601 | 1.204 (0.900 to 1.495) | 0.251 | 1.186 (0.832 to 1.414) | 0.56  | 11  | 1.149 (0.880 to 1.248) | 0.603 | 0.117 | 0.208 |
| Blood zinc                   | 117 | 0.538 (0.324 to 0.893) | 0.017 | 1.011 (0.425 to 2.397) | 0.982 | 0.959 (0.353 to 2.037) | 0.724 | 117 | 0.637 (0.294 to 0.983) | 0.019 | 0.216 | 0.166 |
| Lipid metabolism             |     |                        |       |                        |       |                        |       |     |                        |       |       |       |
| n-3 PUFA                     | 103 | 0.222 (0.130 to 0.450) | 0.021 | 0.301 (0.939 to 1.640) | 0.128 | 1.381 (0.959 to 1.683) | 0.111 | 103 | 0.316 (0.110 to 0.523) | 0.023 | 0.816 | 0.747 |
| Triglycerides                | 114 | 0.907 (0.771 to 1.066) | 0.235 | 0.798 (0.645 to 1.163) | 0.338 | 0.901 (0.660 to 1.138) | 0.315 | 114 | 1.007 (0.771 to 1.066) | 0.237 | 0.802 | 0.833 |
| n-6 PUFA                     | 84  | 0.994 (0.819 to 1.205) | 0.051 | 1.062 (0.744 to 1.245) | 0.769 | 1.008 (0.697 to 1.235) | 0.619 | 84  | 1.004 (0.819 to 1.205) | 0.952 | 0.075 | 0.069 |
| Apolipoprotein A-I           | 36  | 0.977 (0.814 to 1.172) | 0.802 | 1.058 (0.713 to 1.287) | 0.776 | 1.159 (0.758 to 1.448) | 0.789 | 36  | 1.077 (0.814 to 1.172) | 0.804 | 0.282 | 0.371 |
| Total cholesterol            | 42  | 1.030 (0.839 to 1.264) | 0.776 | 1.073 (0.731 to 1.295) | 0.849 | 0.901 (0.590 to 1.130) | 0.237 | 42  | 1.131 (0.839 to 1.264) | 0.778 | 0.071 | 0.082 |
| Glucose metabolism           |     |                        |       |                        |       |                        |       |     |                        |       |       |       |
| Fasting glucose              | 42  | 1.328 (0.872 to 2.023) | 0.186 | 1.311 (0.684 to 2.328) | 0.455 | 1.911 (0.853 to 3.911) | 0.136 | 42  | 1.429 (0.872 to 2.023) | 0.188 | 0.195 | 0.192 |
| HbA1c                        | 33  | 1.430 (0.915 to 1.945) | 0.097 | 1.745 (0.662 to 4.154) | 0.279 | 1.629 (0.772 to 2.644) | 0.144 | 33  | 1.742 (0.915 to 2.945) | 0.099 | 0.468 | 0.472 |
| Fasting insulin              | 54  | 1.310 (0.568 to 2.052) | 0.559 | 1.742 (0.540 to 5.136) | 0.373 | 0.223 (0.010 to 1.235) | 0.092 | 54  | 1.119 (0.568 to 2.852) | 0.561 | 0.381 | 0.375 |
| Obesity traits               |     |                        |       |                        |       |                        |       |     |                        |       |       |       |
| Body mass index              | 523 | 1.103 (0.906 to 1.341) | 0.328 | 1.112 (0.740 to 1.470) | 0.808 | 1.008 (0.550 to 1.814) | 1.007 | 523 | 1.110 (0.906 to 1.341) | 0.331 | 0.416 | 0.471 |
| Whole body fat mass          | 412 | 1.101 (0.891 to 1.362) | 0.374 | 1.114 (0.721 to 1.423) | 0.939 | 1.008 (0.512 to 1.946) | 1.007 | 412 | 1.212 (0.891 to 1.362) | 0.376 | 0.127 | 0.149 |
| Waist circumference          | 67  | 1.365 (0.959 to 1.943) | 0.084 | 1.258 (0.755 to 2.094) | 0.376 | 1.600 (0.304 to 7.408) | 0.632 | 67  | 1.456 (0.959 to 1.943) | 0.086 | 0.517 | 0.472 |
| Hip circumference            | 55  | 0.813 (0.616 to 1.074) | 0.144 | 0.723 (0.462 to 1.033) | 0.07  | 0.862 (0.263 to 2.203) | 0.626 | 55  | 0.793 (0.616 to 1.074) | 0.146 | 0.916 | 0.894 |
| Waist-to-hip ratio           | 36  | 1.632 (1.069 to 1.493) | 0.023 | 1.917 (1.111 to 2.724) | 0.019 | 1.293 (0.254 to 2.278) | 0.879 | 36  | 1.941 (1.099 to 2.783) | 0.075 | 0.841 | 0.776 |

Supplementary Table S3. Variable risk factors for non-infective colitis.

| Exposure               | SNPs | IVW                    |          | WM                      |          | MR-Egger               |          | SNPs | MR-PRESSO              |          | <i>P</i>      | <i>P</i> pleiotropy |
|------------------------|------|------------------------|----------|-------------------------|----------|------------------------|----------|------|------------------------|----------|---------------|---------------------|
|                        |      | OR (95% CI)            | <i>P</i> | OR (95% CI)             | <i>P</i> | OR (95% CI)            | <i>P</i> |      | OR (95% CI)            | <i>P</i> | heterogeneity |                     |
| Exposure to drugs      |      |                        |          |                         |          |                        |          |      |                        |          |               |                     |
| Antibiotics            | 50   | 1.388 (0.482 to 2.295) | 0.898    | 1.211 (0.288 to 2.195)  | 0.831    | 1.170 (0.218 to 5.250) | 0.924    | 50   | 1.153 (0.482 to 2.295) | 0.888    | 0.995         | 1.004               |
| Isotretinoin           | 17   | 1.518 (0.922 to 2.115) | 0.107    | 1.436 (0.826 to 2.157)  | 0.227    | 1.336 (0.203 to 2.532) | 0.809    | 17   | 1.455 (0.937 to 1.957) | 0.097    | 0.138         | 0.107               |
| Lifestyle              |      |                        |          |                         |          |                        |          |      |                        |          |               |                     |
| Smoking                | 102  | 1.884 (1.130 to 2.638) | 0.018    | 2.002 (1.201 to 2.803)  | 0.002    | 1.643 (0.218 to 2.876) | 0.359    | 102  | 1.884 (1.130 to 2.638) | 0.008    | 0.648         | 0.711               |
| Cigarettes per day     | 33   | 0.845 (0.529 to 1.351) | 0.482    | 0.911 (0.477 to 1.719)  | 0.751    | 1.233 (0.495 to 2.589) | 0.760    | 33   | 0.946 (0.529 to 1.351) | 0.472    | 0.458         | 0.431               |
| Breastfeeding          | 42   | 0.675 (0.442 to 0.809) | 0.014    | 0.696 (0.370 to 0.822)  | 0.010    | 2.049 (0.995 to 2.812) | 0.401    | 42   | 0.304 (0.232 to 0.457) | 0.001    | 0.005         | 0.015               |
| Alcoholic drink        | 42   | 1.545 (1.155 to 2.035) | 0.001    | 1.751 (0.409 to 2.903)  | 0.000    | 1.821 (0.735 to 2.490) | 0.070    | 42   | 1.786 (1.236 to 2.336) | 0.002    | 0.583         | 0.569               |
| Fruit intake           | 71   | 0.497 (0.339 to 0.729) | 0.001    | 0.507 (0.328 to 0.829)  | 0.000    | 0.271 (0.217 to 0.518) | 0.010    | 71   | 0.598 (0.440 to 0.830) | 0.001    | 0.821         | 0.828               |
| Vegetables intake      | 32   | 0.266 (0.110 to 0.640) | 0.003    | 0.396 (0.192 to 1.054)  | 0.030    | 0.445 (0.023 to 1.895) | 0.165    | 32   | 0.367 (0.211 to 0.741) | 0.002    | 0.215         | 0.211               |
| Coffee intake          | 33   | 1.580 (0.432 to 2.728) | 0.386    | 1.721 (0.195 to 13.462) | 0.644    | 2.281 (0.452 to 4.012) | 0.595    | 33   | 1.821 (0.432 to 8.728) | 0.376    | 0.572         | 0.478               |
| Tea intake             | 23   | 1.051 (0.481 to 1.921) | 0.115    | 0.925 (0.628 to 1.082)  | 0.152    | 1.156 (0.851 to 1.310) | 0.615    | 23   | 1.012 (0.970 to 1.256) | 0.971    | 0.042         | 0.051               |
| High vitamin D level   | 87   | 0.435 (0.220 to 0.862) | 0.017    | 1.011 (0.293 to 2.830)  | 0.861    | 1.006 (0.279 to 2.940) | 0.859    | 87   | 0.536 (0.321 to 0.963) | 0.007    | 0.153         | 0.129               |
| Cesarean delivery      | 46   | 1.001 (0.753 to 1.308) | 0.221    | 1.103 (0.888 to 1.276)  | 0.514    | 1.098 (0.799 to 1.393) | 0.406    | 46   | 1.113 (0.793 to 1.405) | 0.112    | 0.236         | 0.402               |
| Physical activity      | 56   | 0.275 (0.173 to 1.033) | 0.056    | 0.206 (0.019 to 0.578)  | 0.001    | 0.243 (0.101 to 1.009) | 0.570    | 56   | 0.376 (0.073 to 1.033) | 0.066    | 0.075         | 0.118               |
| Surgeries              |      |                        |          |                         |          |                        |          |      |                        |          |               |                     |
| Appendectomy           | 65   | 1.876 (1.259 to 2.795) | 0.002    | 1.692 (0.821 to 3.082)  | 0.158    | 1.171 (0.318 to 3.598) | 0.902    | 65   | 1.939 (1.340 to 2.826) | 0.001    | 0.035         | 0.046               |
| Tonsillectomy          | 50   | 1.070 (1.059 to 1.601) | 0.121    | 0.935 (0.628 to 1.082)  | 0.162    | 1.146 (0.851 to 1.310) | 0.515    | 50   | 1.023 (0.869 to 1.155) | 0.881    | 0.060         | 0.072               |
| Related diseases       |      |                        |          |                         |          |                        |          |      |                        |          |               |                     |
| Type 2 diabetes        | 88   | 1.004 (0.823 to 1.226) | 0.968    | 0.924 (0.592 to 1.145)  | 0.237    | 1.215 (0.692 to 1.795) | 0.645    | 88   | 1.112 (0.823 to 1.226) | 0.958    | 0.210         | 0.229               |
| Chronic kidney disease | 14   | 0.813 (0.486 to 1.362) | 0.432    | 0.957 (0.466 to 1.571)  | 0.604    | 0.945 (0.150 to 4.756) | 0.855    | 14   | 0.914 (0.486 to 1.362) | 0.422    | 0.861         | 0.853               |
| Autoimmune             | 81   | 0.880 (0.738 to 1.050) | 0.156    | 0.885 (0.602 to 1.020)  | 0.059    | 0.863 (0.561 to 1.035) | 0.075    | 81   | 0.981 (0.738 to 1.050) | 0.146    | 0.213         | 0.214               |
| Celiac disease         | 14   | 0.998 (0.932 to 1.069) | 0.958    | 1.112 (0.918 to 1.114)  | 0.815    | 1.066 (0.861 to 1.085) | 0.554    | 14   | 1.098 (0.932 to 1.069) | 0.948    | 0.961         | 0.970               |

|                              |     |                        |       |                         |       |                        |       |     |                         |       |       |       |
|------------------------------|-----|------------------------|-------|-------------------------|-------|------------------------|-------|-----|-------------------------|-------|-------|-------|
| Systemic lupus erythematosus | 23  | 0.958 (0.890 to 1.032) | 0.262 | 1.027 (0.831 to 1.035)  | 0.168 | 1.068 (0.821 to 1.142) | 0.690 | 23  | 1.058 (0.890 to 1.032)  | 0.252 | 0.755 | 0.705 |
| Blood parameters             |     |                        |       |                         |       |                        |       |     |                         |       |       |       |
| Blood calcium                | 11  | 0.888 (0.311 to 2.538) | 0.825 | 1.275 (0.343 to 4.017)  | 0.787 | 1.097 (0.330 to 2.983) | 0.428 | 11  | 0.989 (0.311 to 2.538)  | 0.815 | 0.708 | 0.724 |
| Blood Lactose                | 12  | 1.000 (0.792 to 1.264) | 0.998 | 1.145 (0.815 to 1.336)  | 0.724 | 1.001 (0.779 to 2.698) | 0.264 | 12  | 0.998 (0.792 to 1.264)  | 0.988 | 0.450 | 0.381 |
| C-reactive protein           | 11  | 0.775 (0.565 to 1.062) | 0.113 | 0.750 (0.461 to 1.218)  | 0.233 | 0.908 (0.501 to 1.299) | 0.369 | 11  | 0.876 (0.565 to 1.062)  | 0.103 | 0.992 | 0.997 |
| Blood zinc                   | 117 | 0.087 (0.434 to 2.721) | 0.859 | 1.247 (0.472 to 2.768)  | 0.312 | 1.339 (0.478 to 2.458) | 0.286 | 117 | 1.188 (0.434 to 2.721)  | 0.849 | 0.747 | 0.853 |
| Lipid metabolism             |     |                        |       |                         |       |                        |       |     |                         |       |       |       |
| n-3 PUFA                     | 103 | 0.476 (0.259 to 0.795) | 0.042 | 1.692 (0.821 to 3.082)  | 0.158 | 1.171 (0.318 to 3.598) | 0.902 | 103 | 0.639 (0.340 to 0.826)  | 0.002 | 0.035 | 0.036 |
| Triglycerides                | 114 | 0.862 (0.624 to 1.192) | 0.369 | 1.177 (0.607 to 1.908)  | 0.792 | 1.090 (0.573 to 1.710) | 0.959 | 114 | 0.963 (0.624 to 1.192)  | 0.359 | 0.241 | 0.273 |
| n-6 PUFA                     | 84  | 1.091 (0.749 to 1.589) | 0.649 | 1.140 (0.637 to 1.696)  | 0.866 | 1.325 (0.701 to 2.136) | 0.469 | 84  | 0.991 (0.749 to 1.589)  | 0.639 | 0.047 | 0.063 |
| Apolipoprotein A-I           | 36  | 1.061 (0.747 to 1.506) | 0.742 | 1.221 (0.595 to 2.110)  | 0.714 | 1.212 (0.595 to 2.071) | 0.732 | 36  | 0.961 (0.747 to 1.506)  | 0.732 | 0.438 | 0.387 |
| Total cholesterol            | 42  | 1.085 (0.748 to 1.574) | 0.668 | 1.148 (0.606 to 1.810)  | 0.858 | 1.218 (0.610 to 2.043) | 0.711 | 42  | 0.985 (0.748 to 1.574)  | 0.658 | 0.166 | 0.265 |
| Glucose metabolism           |     |                        |       |                         |       |                        |       |     |                         |       |       |       |
| Fasting glucose              | 42  | 0.794 (0.371 to 1.699) | 0.552 | 0.499 (0.146 to 1.708)  | 0.257 | 0.356 (0.064 to 1.008) | 0.144 | 42  | 0.895 (0.371 to 1.699)  | 0.542 | 0.691 | 0.789 |
| HbA1c                        | 33  | 0.760 (0.236 to 2.448) | 0.646 | 1.144 (0.184 to 7.120)  | 0.874 | 0.619 (0.052 to 5.169) | 0.566 | 33  | 0.861 (0.236 to 2.448)  | 0.636 | 0.205 | 0.295 |
| Fasting insulin              | 54  | 1.763 (0.374 to 2.153) | 0.394 | 4.837 (0.459 to 50.922) | 0.178 | 1.574 (0.627 to 2.344) | 0.234 | 54  | 2.232 (0.374 to 12.153) | 0.384 | 0.002 | 0.084 |
| Obesity traits               |     |                        |       |                         |       |                        |       |     |                         |       |       |       |
| Body mass index              | 523 | 1.106 (0.848 to 1.442) | 0.458 | 1.046 (0.629 to 1.424)  | 0.780 | 0.644 (0.242 to 1.215) | 0.127 | 523 | 1.207 (0.848 to 1.442)  | 0.448 | 0.245 | 0.298 |
| Whole body fat mass          | 412 | 1.358 (0.904 to 2.039) | 0.140 | 1.459 (0.707 to 2.607)  | 0.347 | 0.788 (0.192 to 2.461) | 0.554 | 412 | 1.459 (0.904 to 2.039)  | 0.130 | 0.189 | 0.198 |
| Waist circumference          | 67  | 0.929 (0.794 to 1.086) | 0.355 | 1.033 (0.790 to 1.103)  | 0.407 | 0.995 (0.589 to 1.717) | 0.975 | 67  | 1.009 (0.794 to 1.086)  | 0.345 | 0.998 | 1.009 |
| Hip circumference            | 55  | 0.972 (0.781 to 1.210) | 0.801 | 1.195 (0.794 to 1.508)  | 0.572 | 1.003 (0.714 to 1.380) | 0.954 | 55  | 1.072 (0.781 to 1.210)  | 0.791 | 0.848 | 0.899 |
| Waist-to-hip ratio           | 36  | 1.836 (0.813 to 4.148) | 0.144 | 1.420 (0.490 to 4.567)  | 0.646 | 1.562 (0.128 to 2.151) | 0.842 | 36  | 1.937 (0.914 to 4.249)  | 0.134 | 0.494 | 0.485 |
